# Supplementary material for: Morphology and phase evolution from CuS to Cu1.8S in a hydrothermal process and thermoelectric properties of Cu1.8S bulk
Source: Royal Society of Chemistry journal article supplement (doi:10.1039/c9ce00936a), 2019-01-01
Supplement: c9ce00936a1.pdf [file c9ce00936a1.pdf]

Electronic Supplementary information

**Morphology and Phase Evolution from CuS to Cu<sub>1.8</sub>S  
in a Hydrothermal Process and Thermoelectric  
Properties of Cu<sub>1.8</sub>S Bulk**

Rui Zhang,<sup>a</sup> Yin Wu,<sup>a</sup> Jun Pei,<sup>a</sup> Zhen-Hua Ge,<sup>\*, b</sup> Bo-Ping Zhang,<sup>\*, a</sup> Qiang Sun<sup>c</sup> and  
Ge Nie<sup>d</sup>

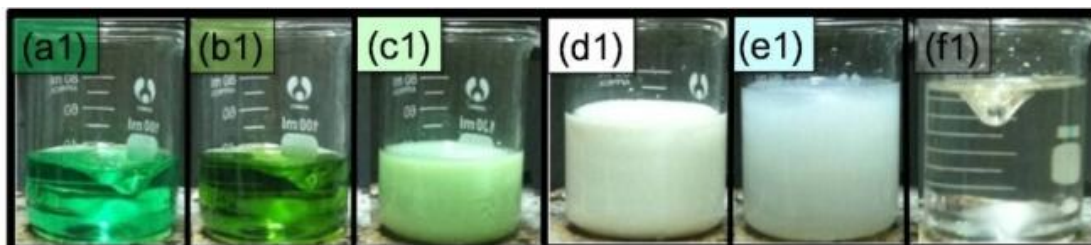

Fig. S1 Color variations of precursor solution with increasing CS(NH<sub>2</sub>)<sub>2</sub> contents.
